# Supplementary material
Source: PubMed Central journal article supplement (PMC6121993)
Supplement: zam018188730s1.pdf [file zam018188730s1.pdf]

1 **Stable Expression of Modified Green Fluorescent Protein in Group B Streptococcus**  
2 **to Enable Visualization in Experimental Systems**

3

4 Matthew J. Sullivan and Glen C. Ulett<sup>#</sup>

5

6 School of Medical Science, and Menzies Health Institute Queensland, Griffith

7 University, Gold Coast, Queensland, Australia<sup>a</sup>

8

9

10 **SUPPLEMENTAL MATERIAL**

11

12  
13  
14  
15  
16  
17  
18  
19  
20  
21  
22  
23  
24  
25  
26

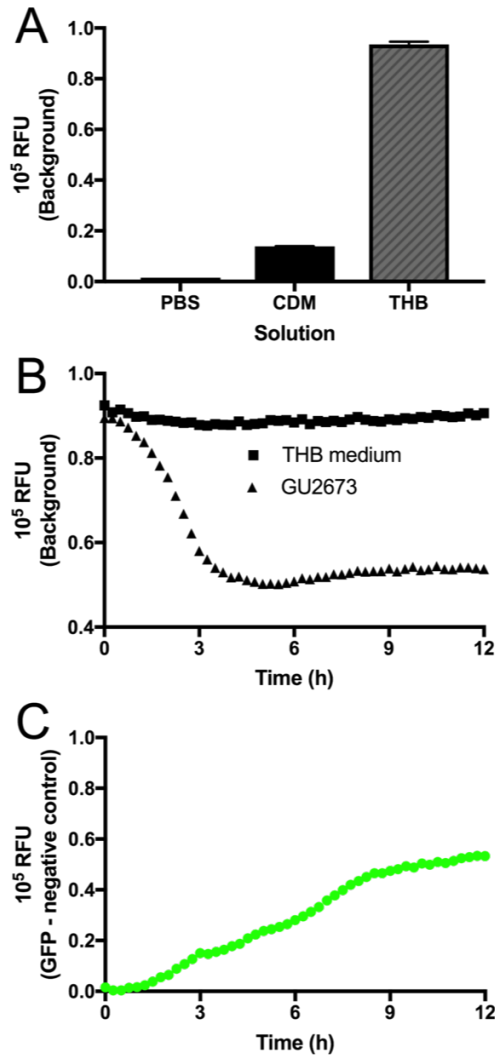

27 **Supplementary FIG. S1.** Media used for bacteriology exhibited different levels of  
28 autofluorescence at the excitation emission wavelengths used for the detection of  
29 GFPmut3 (A). Autofluorescence detected in THB medium remains stable in the absence  
30 of bacteria (squares) but in the presence of GBS (triangles) declines in a manner inversely  
31 proportional to culture density (shown in Fig 6). Negative control correction of  
32 fluorescence intensity can be used to adjust for the autofluorescence background  
33 interference detected in THB medium to provide a fluorescence profile (C) similar to that  
34 detected using fluorescence polarization intensity (shown in Fig 6C).

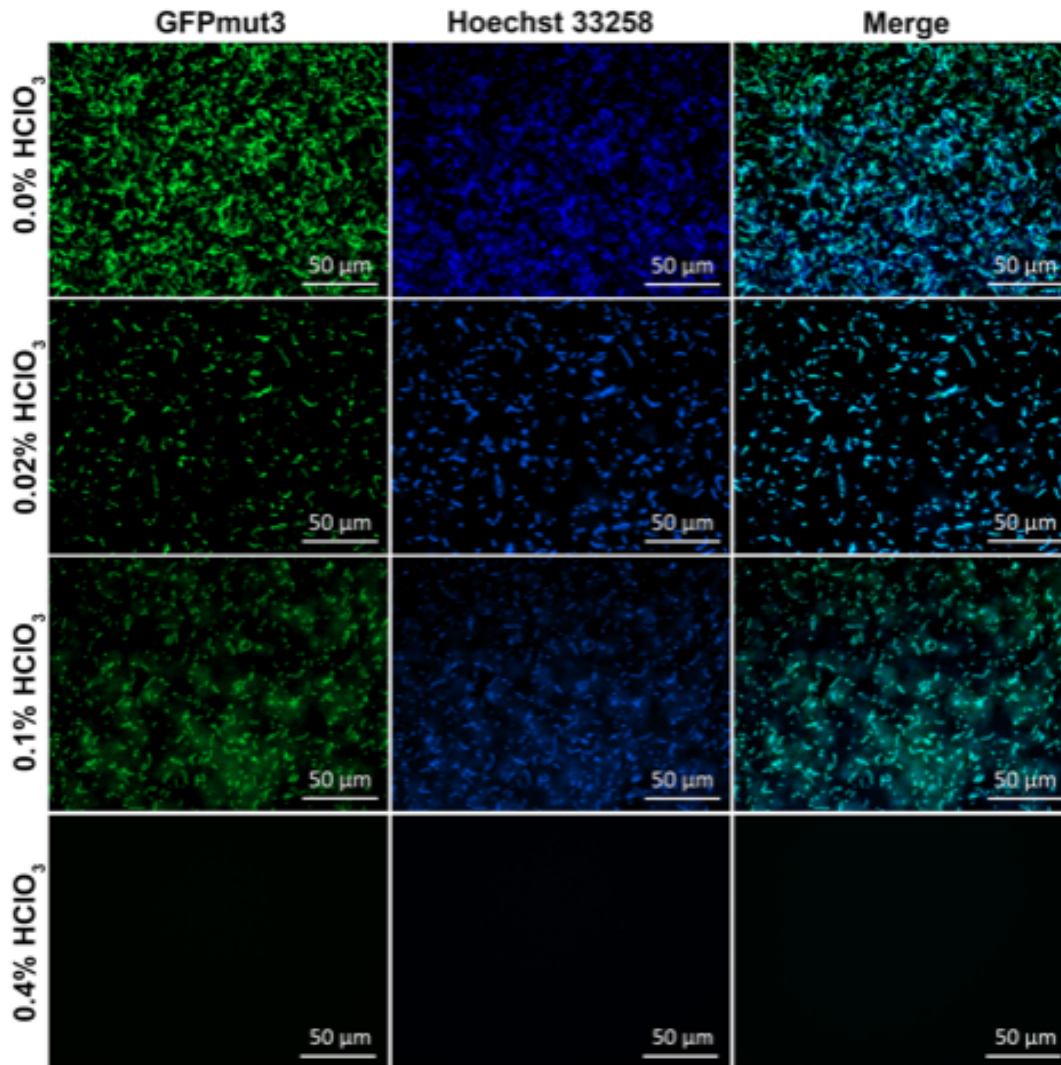

35 **Supplementary FIG. S2. Effect of increasing concentrations of sodium hypochlorite**  
 36 **on GBS cell morphology and fluorescence.** GBS strain 874391 (2, 4, 5) were rendered  
 37 non-viable following exposure to sodium hypochlorite  $\geq 0.02\%$ , according to colony  
 38 count assays (Fig 7B). However, GBS continued to emit high levels of fluorescence at  
 39 this level of sodium hypochlorite (upper panels). Sodium hypochlorite 0.4% abolished  
 40 the fluorescence and destroyed the bacteria (bottom panel), while 0.1% attenuated  
 41 fluorescence in intact GBS cells (Fig 7A), which were rendered non-viable, according to  
 42 colony count assays.

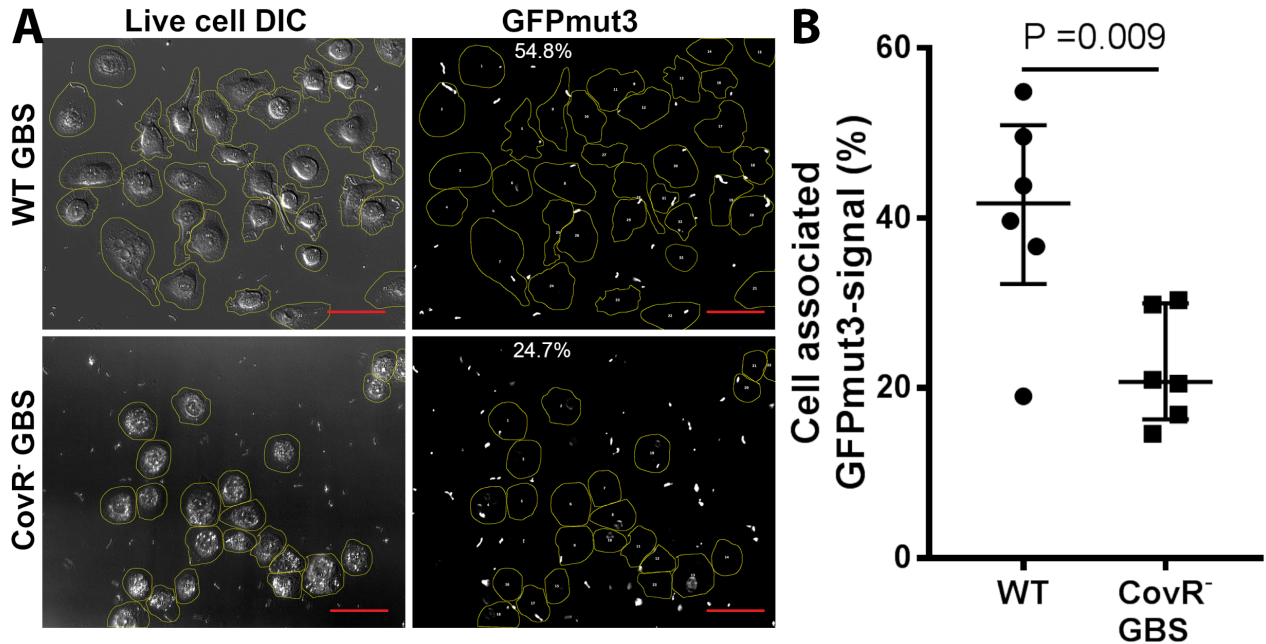

43 **Supplementary FIG. S3. Relative quantitation of cell-associated fluorescence in**  
 44 **assays comparing the adhesion of WT GBS and CovR mutant to human cells.**

45 Inoculation of 5637 uroepithelial cells with WT and CovR mutant GBS (3) (both carrying  
 46 plasmid pGU2664) shows the attenuated adherence phenotype of the CovR mutant based  
 47 on the fluorescence detection of GFPmut3; representative cell masks used to quantitate  
 48 pixels is shown in (A). Quantitation of the fluorescence signals in areas co-located with  
 49 the human cells (cell-associated fluorescence) was achieved using ImageJ software 1.51  
 50 (1), and compared to acellular areas (slide-associated fluorescence); six fields-of-view  
 51 (one representative shown for WT and mutant) were analyzed to generate quantitative  
 52 data and revealed significantly more fluorescence signal co-located with epithelial cells  
 53 inoculated with WT GBS versus the CovR mutant (B). Scale bars = 50  $\mu$ m; % shown is  
 54 cell-associated fluorescence detected for that image.

55

56 **Supplementary Movie. S1. Visualization of adhesion of GBS to human cells.** 5637  
57 uroepithelial cells were inoculated with GU2666 (GFP+) containing plasmid pGU2664  
58 and video was captured after 2 h of static incubation and subsequent initiation of flow.  
59 The video (30 s total, looped 5x) shows human cells with bound GBS (red arrows) amid a  
60 background of media and bacteria flowing through the chamber. The video highlights  
61 many chains of non-adhered GBS passing in the flow-through (red box). The video  
62 represents ~0.8 chamber-volumes of media using medium flow conditions, as described  
63 in Materials and Methods.

64

#### 65 **Supplemental References**

- 66 1. **Schneider, C. A., W. S. Rasband, and K. W. Eliceiri.** 2012. NIH Image to  
67 ImageJ: 25 years of image analysis. *Nat. Methods* **9**:671-675.
- 68 2. **Sullivan, M. J., B. M. Forde, D. W. Prince, D. S. Ipe, N. L. Ben Zakour, M. R.**  
69 **Davies, G. Dougan, S. A. Beatson, and G. C. Ulett.** 2017. Complete Genome  
70 Sequence of Serotype III *Streptococcus agalactiae* Sequence Type 17 Strain  
71 874391. *Genome Announcements* **5**.
- 72 3. **Sullivan, M. J., S. Y. Leclercq, D. S. Ipe, A. J. Carey, J. P. Smith, N. Voller,**  
73 **A. W. Cripps, and G. C. Ulett.** 2017. Effect of the *Streptococcus agalactiae*  
74 Virulence Regulator CovR on the Pathogenesis of Urinary Tract Infection. *J.*  
75 *Infect. Dis.* **215**:475-483.
- 76 4. **Takahashi, S., Y. Nagano, N. Nagano, K. Fujita, F. Taguchi, and Y.**  
77 **Okuwaki.** 1993. Opsonisation of group B streptococci and restriction  
78 endonuclease digestion patterns of their chromosomal DNA. *J. Med. Microbiol.*  
79 **38**:191-196.
- 80 5. **Takahashi, S., Y. Nagano, N. Nagano, O. Hayashi, F. Taguchi, and Y.**  
81 **Okuwaki.** 1995. Role of C5a-ase in group B streptococcal resistance to  
82 opsonophagocytic killing. *Infect. Immun.* **63**:4764-4769.

83
